# Supplementary material
Source: PubMed Central journal article supplement (PMC6391557)
Supplement: 822739_Appendix.pdf [file 822739_Appendix.pdf]

## Appendix

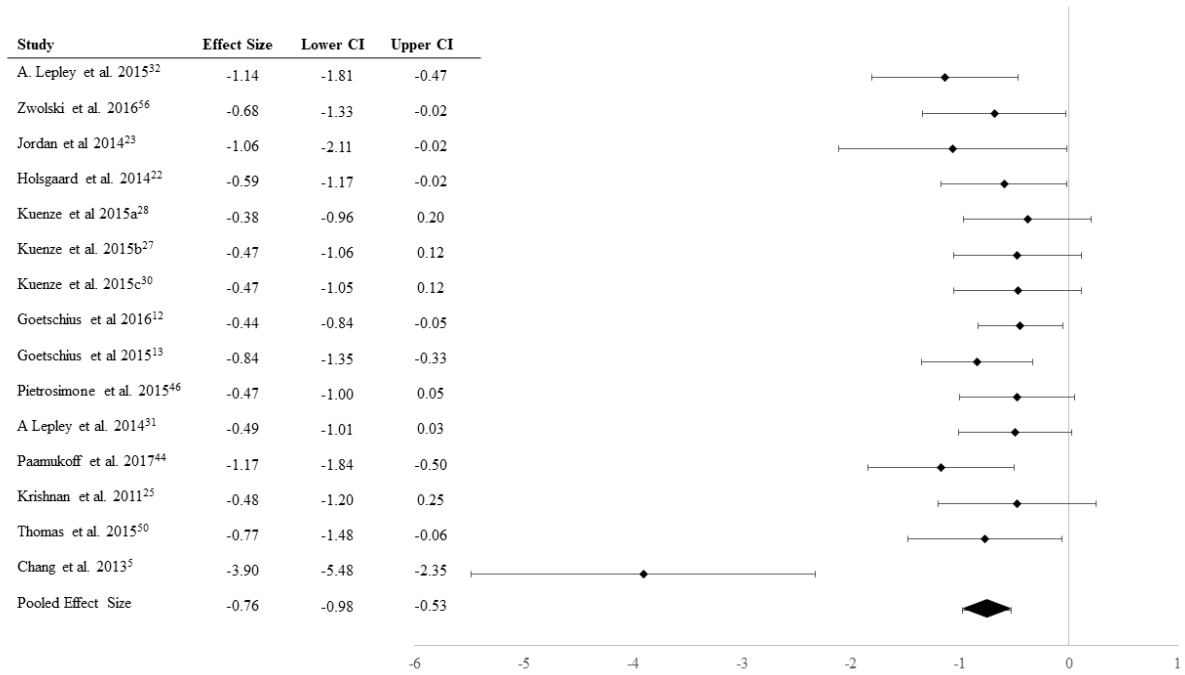

**Figure A1.** Forest plots, effect sizes, and 95% confidence intervals (Cis) of involved ACLR limb and healthy control limb between-group comparisons of maximal voluntary isometric contractions. Large diamond, combined pooled effect sizes for all included data points.

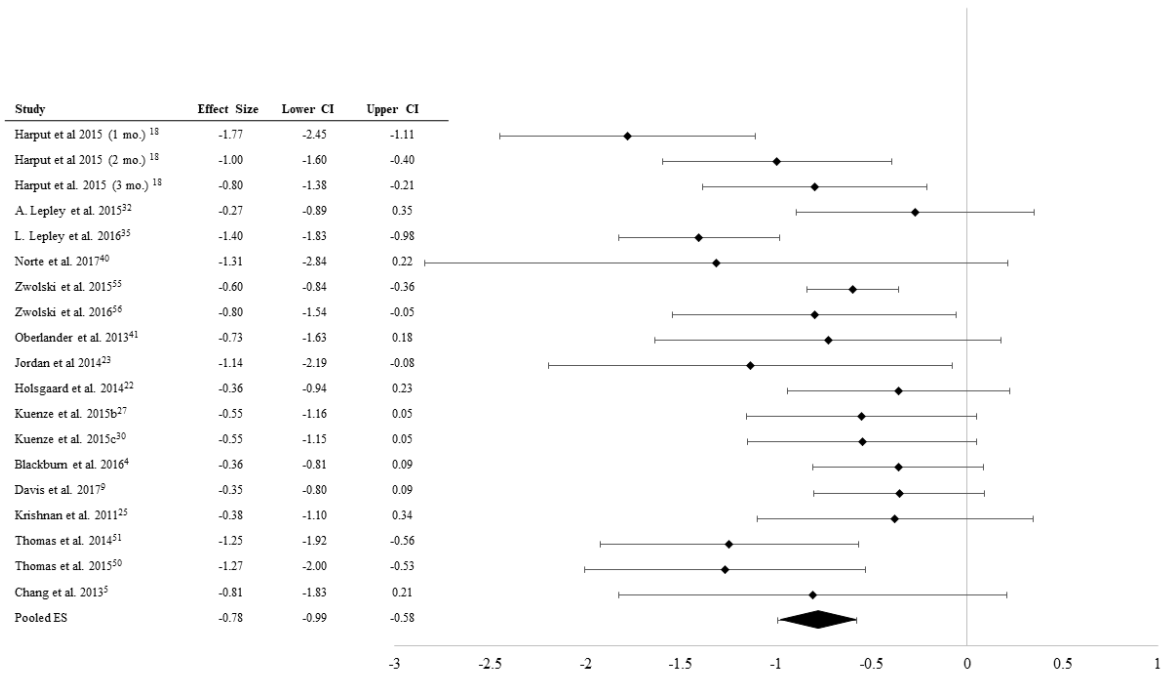

**Figure A2.** Forest plots, effect sizes, and 95% confidence intervals (Cis) of involved ACLR and contralateral limb between-group comparisons of maximal voluntary isometric contractions. Large diamond, combined pooled effect sizes for all included data points.

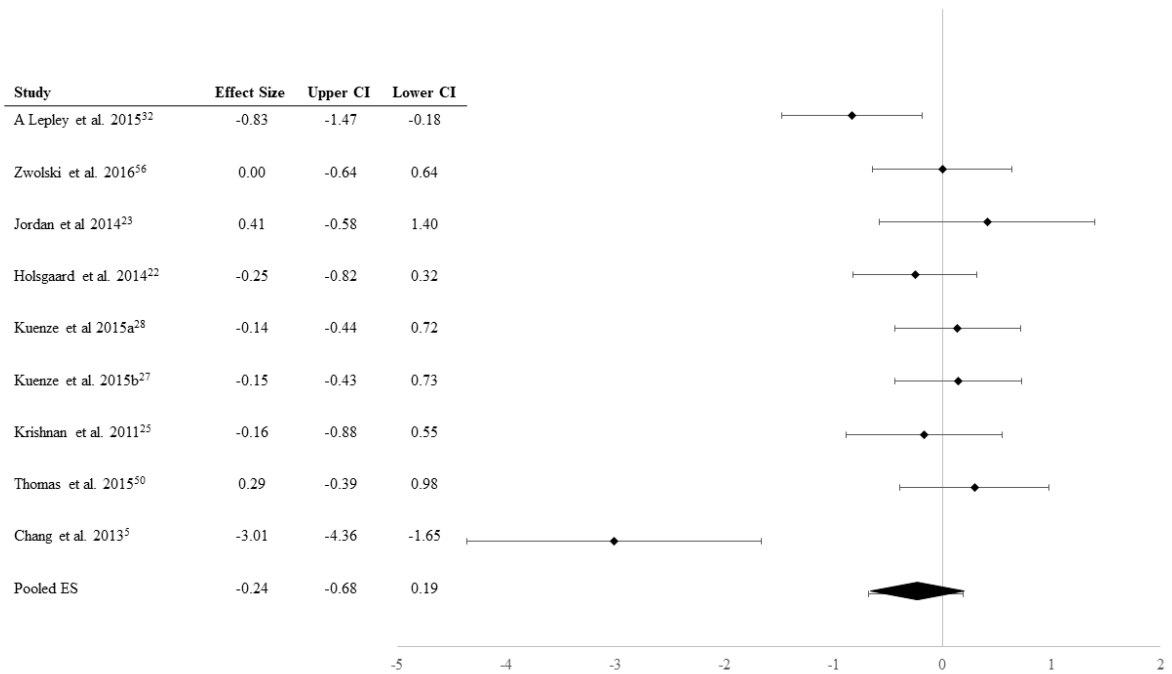

**Figure A3.** Forest plots, effect sizes, and 95% confidence intervals (Cis) of contralateral ACLR limb and healthy control limb between-group comparisons of maximal voluntary isometric contractions. Large diamond, combined pooled effect sizes for all included data points.

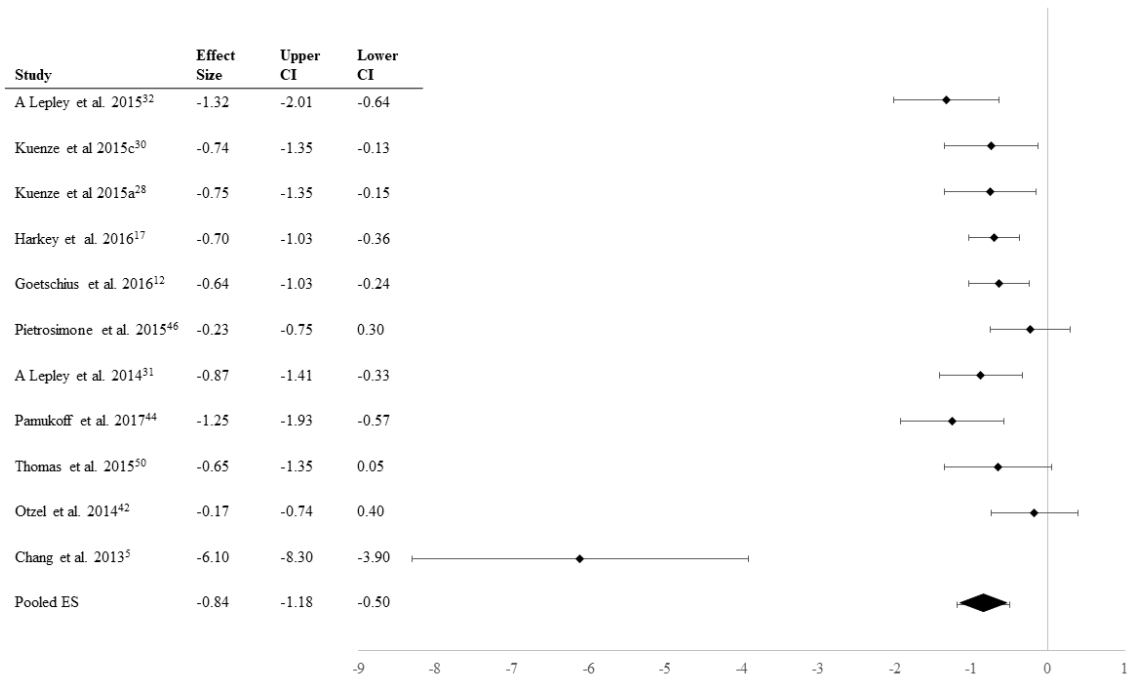

**Figure A4.** Forest plots, effect sizes, and 95% confidence intervals (CIs) of involved ACLR limb and healthy control limb between-group comparisons of central activation ratios. Large diamond, combined pooled effect sizes for all included data points.

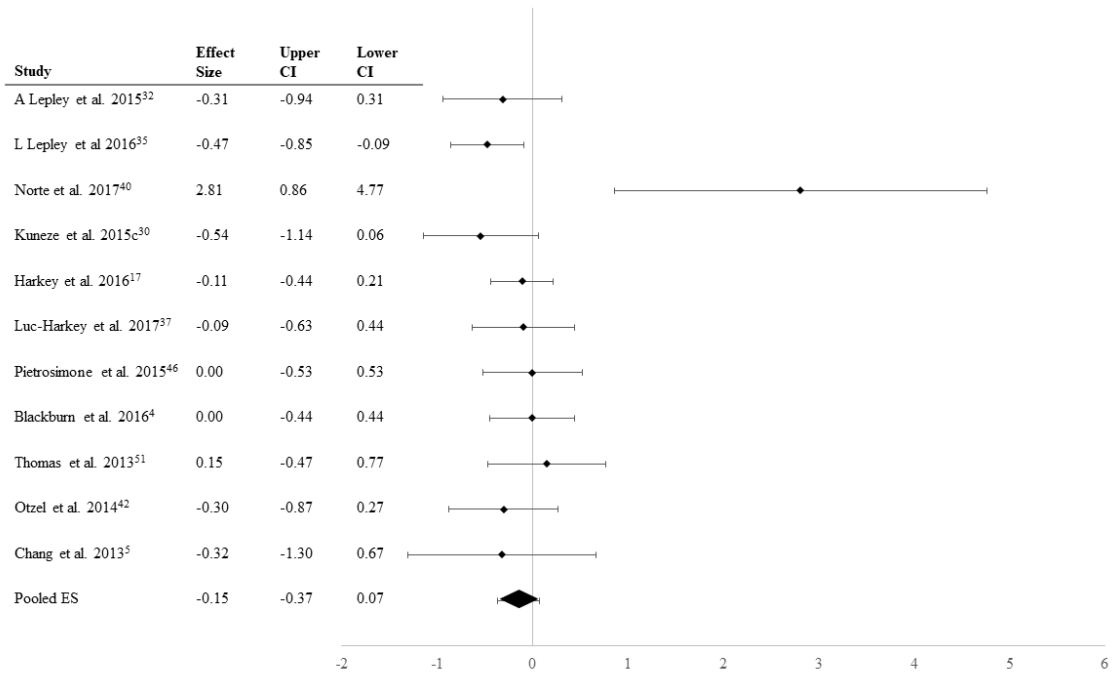

**Figure A5.** Forest plots, effect sizes, and 95% confidence intervals (CIs) of involved ACLR and contralateral limb between-group comparisons of central activation ratios. Large diamond, combined pooled effect sizes for all included data points.

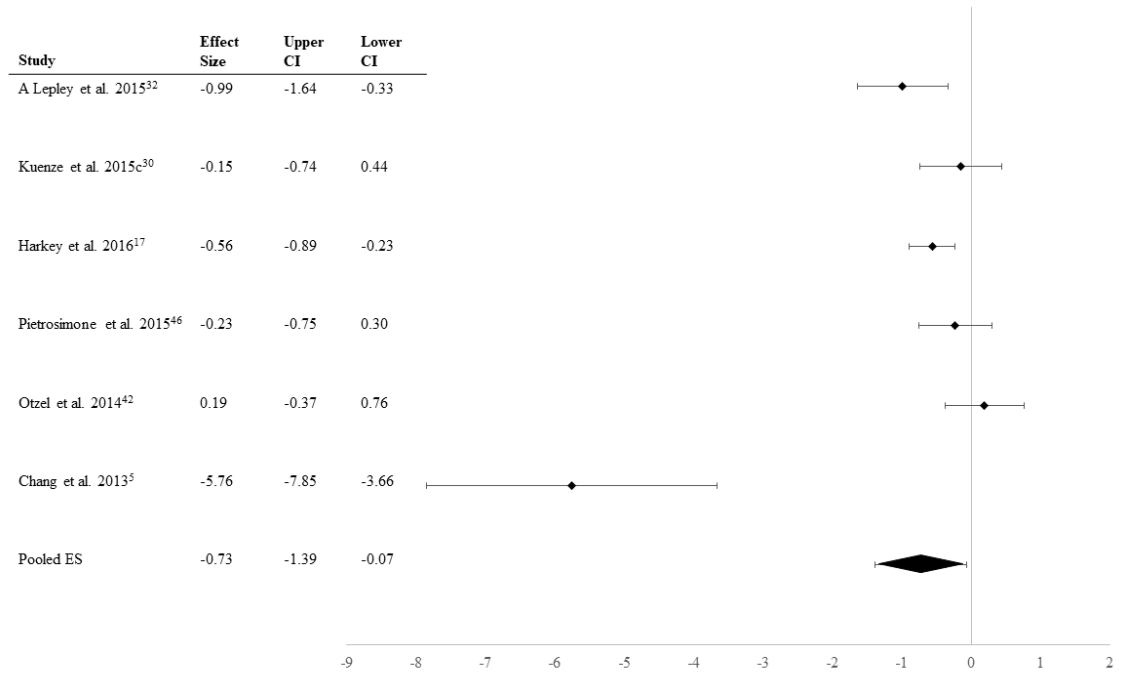

**Figure A6.** Forest plots, effect sizes, and 95% confidence intervals (CIs) of contralateral ACLR limb and healthy control limb between-group comparisons of central activation ratios. Large diamond, combined pooled effect sizes for all included data points.

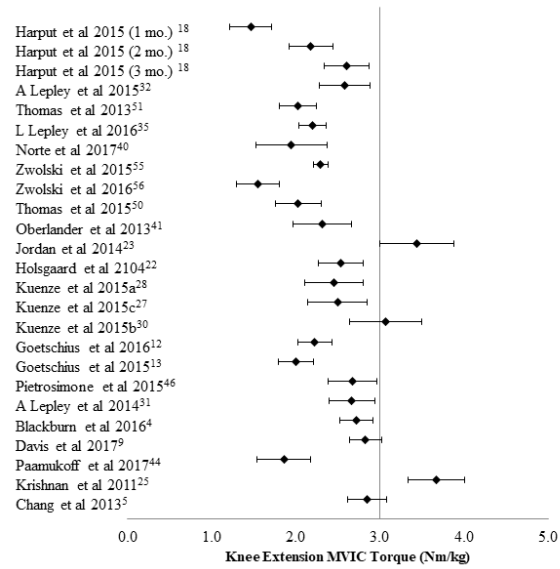

**Figure A7.** Involved ACLR limb means and 95% confidence intervals in relation to 3.0 Nm/kg cut-off predictive of self-reported knee function. MVIC, maximal voluntary isometric knee contraction.
